# Supplementary material for: Effect of Huangqin Decoction on Regulating Intestinal Flora in Colitis Mice Characterized as The Inhibition of NOD2-Dependent Pathway
Source: Research Square preprint supplement (doi:10.21203/rs.3.rs-136209/v1), 2020-12-30
Supplement: Supplementary file 1 [file b88e013e3d13088889a5bacc.docx]

Table S1 Criteria for histological grading

| Score | Injure of colonic tissue |
| --- | --- |
| 0 | no ulcer，no inflammation  local mucosal hyperemia, no ulcer  formation of ulcer  Single ulcer,mucosal inflammation  multiple ulcers, mucosal inflammation  ulcer area＞2cm, mucosal hyperemia, edema and severe erosion |
| 1 |
| 2 |
| 3 |
| 4 |
| 5 |
